# Supplementary material
Source: ML conference proceedings conference paper supplement (https://proceedings.neurips.cc/paper_files/paper/2022/hash/8c0f7107ab85892ccf51f0a814957af1-Abstract.html)
Supplement: Supplementary file 1 [file 8c0f7107ab85892ccf51f0a814957af1-Supplemental-Conference.zip]

Archive with 2 entries (2 files):
- AWM_appendix.pdf
- Code Link.md
