# Supplementary material
Source: ML conference proceedings conference paper supplement (https://proceedings.neurips.cc/paper_files/paper/2022/hash/8c0f7107ab85892ccf51f0a814957af1-Abstract.html)
Supplement: Supplementary file 1 [file 8c0f7107ab85892ccf51f0a814957af1-Supplemental-Conference.zip › Code Link.md]

Code Link: https://github.com/jinghuichen/AWM
